# Supplementary material for: TLC-Bioautography-Guided Isolation and Assessment of Antibacterial Compounds from Manuka (Leptospermum scoparium) Leaf and Branch Extracts
Source: MDPI journal article supplement (doi:10.3390/molecules29030717), 2024-02-04
Supplement: s1 [file s1]

## Supplementary data

### Supplementary data A. Workflow used in Compound Discoverer 3.3.

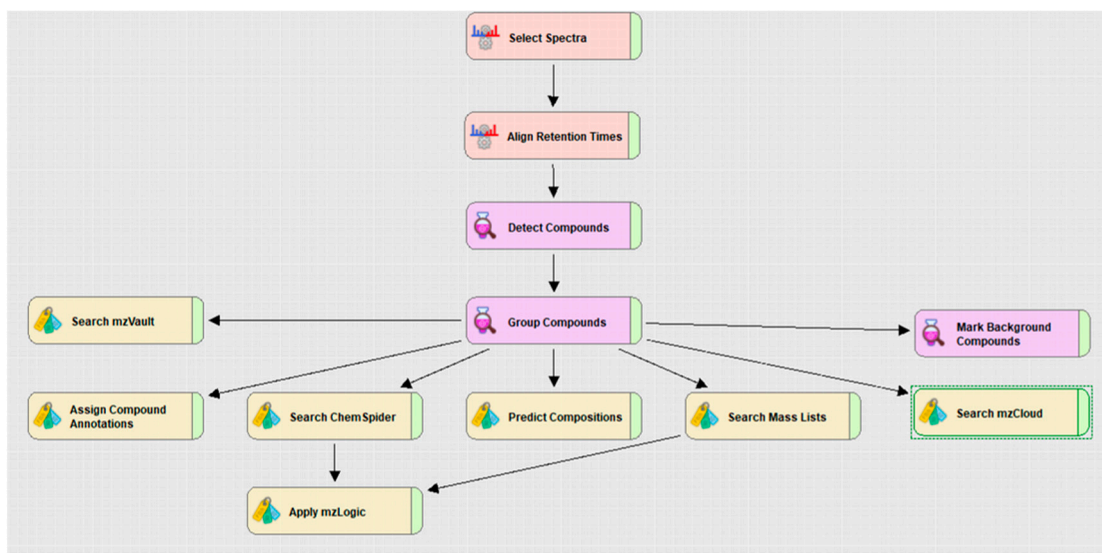

### Supplementary data B. Databases included in MassList:

1. Arita Lab 6549 Flavonoid Structure Database
2. EFS HRAM Compound Database
3. Endogenous Metabolites Database
4. Example Mass List
5. Extractables and Leachables HRAM Compound Database
6. Lipid Maps Structure Database
7. Natural Products Atlas 1
8. Natural Products Atlas 2

Supplementary data C. LC-MS raw data of Manuka hexane and dichloromethane extracts.

C-1: LC-MS analysis of Manuka hexane extracts. (1) NZ untreated; (2) NZ steam-distilled; (3) CN untreated

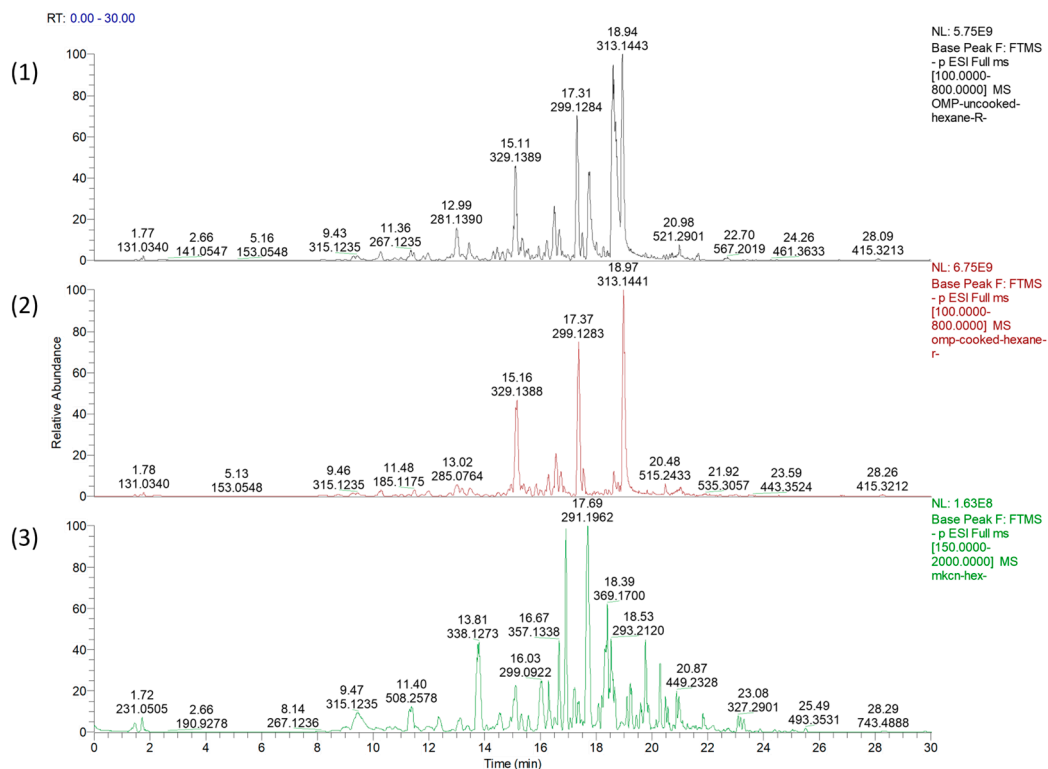

C-2: LC-MS analysis of Manuka dichloromethane extracts. (1) NZ untreated (2) CN untreated

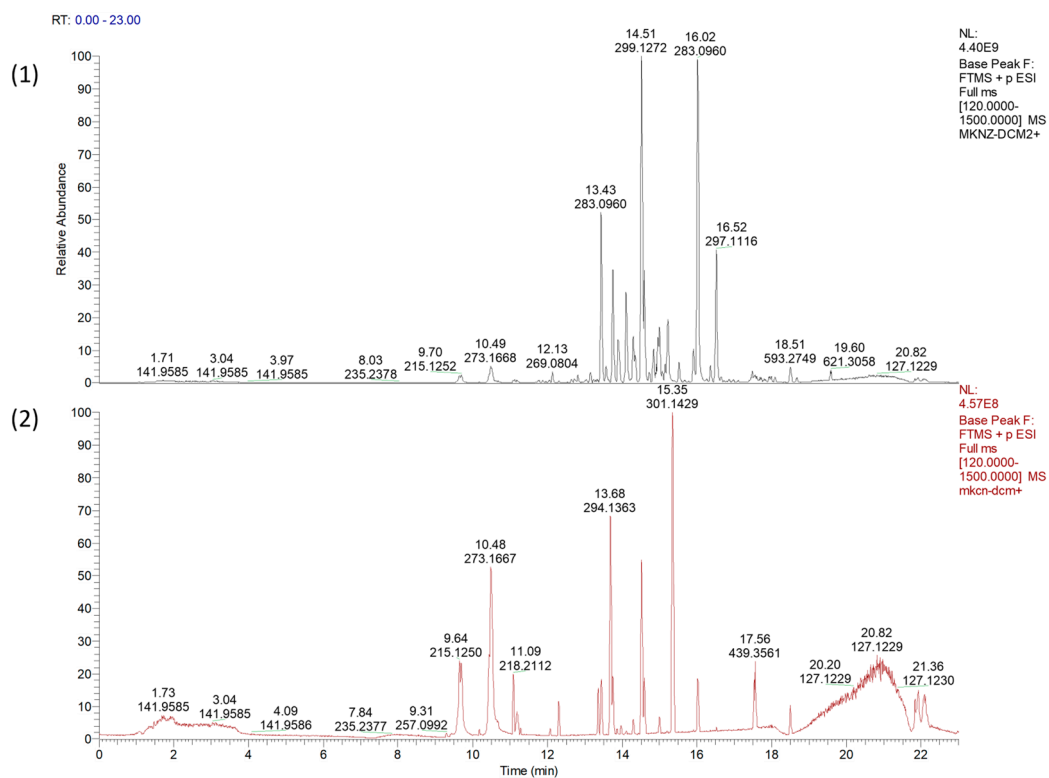

Supplementary data D.  $^1\text{H}$ ,  $^{13}\text{C}$  and DEPT NMR spectrum of obtained Flavone.

$^1\text{H}$  NMR original graph:

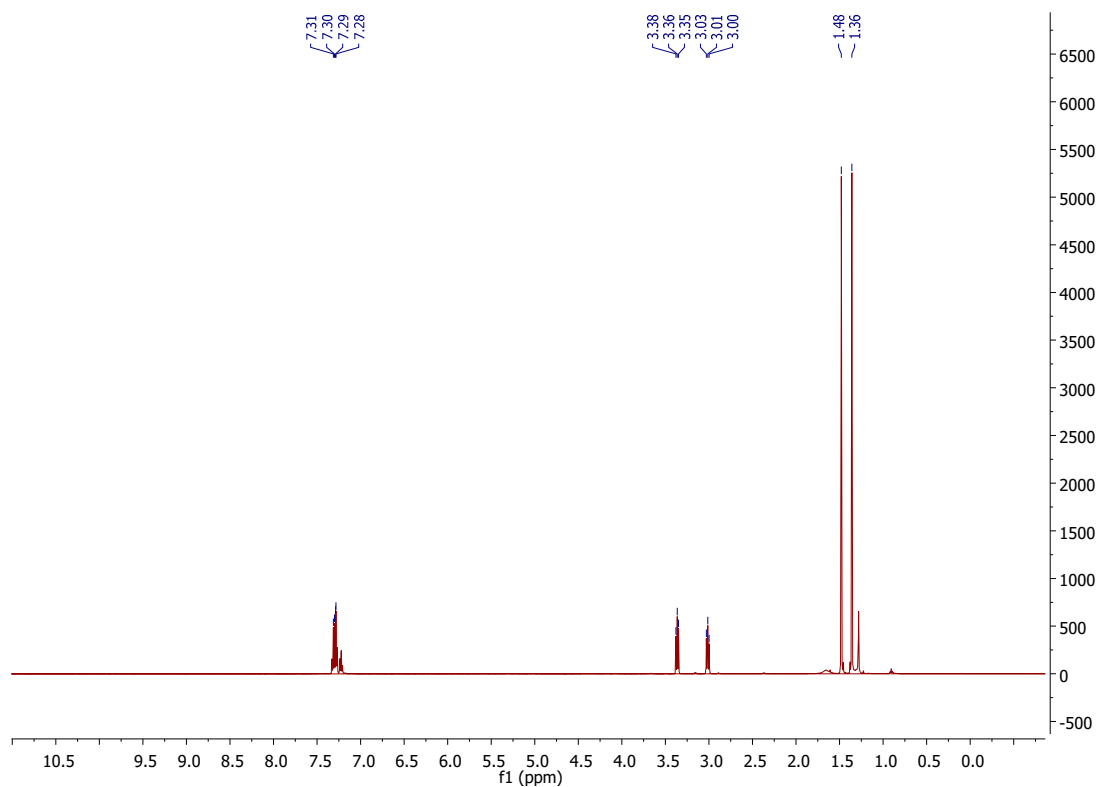

$^1\text{H}$  NMR partial magnified graph:

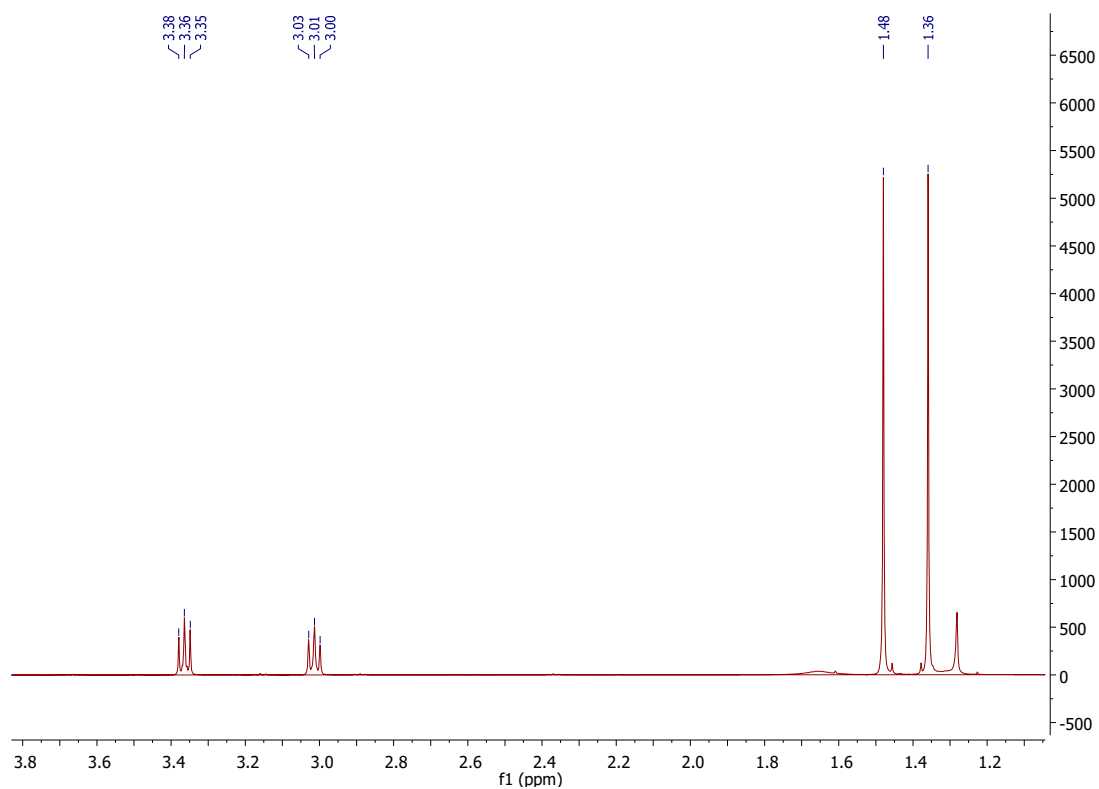

$^{13}\text{C}$  NMR original graph:

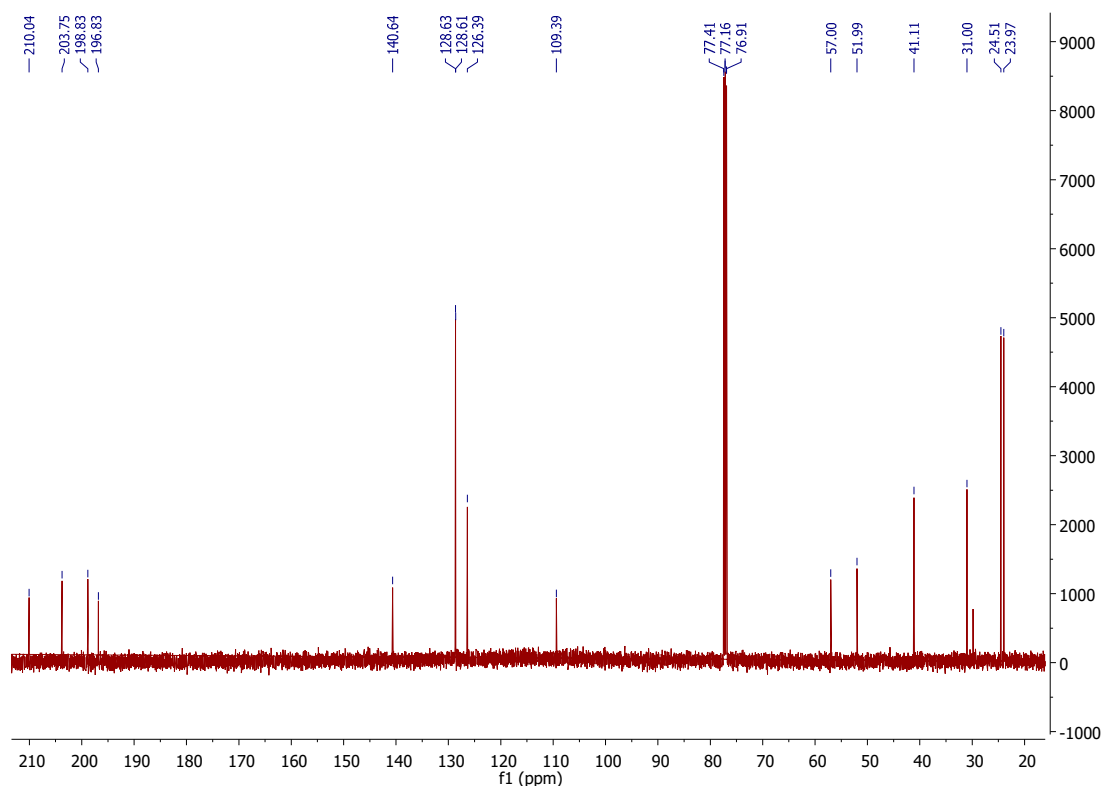

E-1: mzCloud matching results.

E-2: Mass Lists matching results.

| Structure                                                                           | Name                                                              | RT [min] | Formula                                        | Calc. MW  | m/z       | Mass List Matches                                                                     |
|-------------------------------------------------------------------------------------|-------------------------------------------------------------------|----------|------------------------------------------------|-----------|-----------|---------------------------------------------------------------------------------------|
| 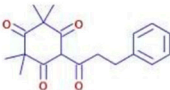   | 2,2,4,4-Tetramethyl-6-(3-phenylpropanoyl)-1,3,5-cyclohexanetrione | 18.94    | C <sub>19</sub> H <sub>22</sub> O <sub>4</sub> | 314.15159 | 313.14432 |    |
| Structure                                                                           | Name                                                              | RT [min] | Formula                                        | Calc. MW  | m/z       | Mass List Matches                                                                     |
|    | Isoleptospermone                                                  | 18.60    | C <sub>15</sub> H <sub>22</sub> O <sub>4</sub> | 266.15144 | 265.14417 |    |
| Structure                                                                           | Name                                                              | RT [min] | Formula                                        | Calc. MW  | m/z       | Mass List Matches                                                                     |
|    | Flavesone                                                         | 17.76    | C <sub>14</sub> H <sub>20</sub> O <sub>4</sub> | 252.13569 | 251.12842 |    |
| Structure                                                                           | Name                                                              | RT [min] | Formula                                        | Calc. MW  | m/z       | Mass List Matches                                                                     |
|    | 2,2,4-Trimethyl-6-(3-phenylpropanoyl)-1,3,5-cyclohexanetrione     | 17.31    | C <sub>18</sub> H <sub>20</sub> O <sub>4</sub> | 300.13573 | 299.12845 |    |
| Structure                                                                           | Name                                                              | RT [min] | Formula                                        | Calc. MW  | m/z       | Mass List Matches                                                                     |
|  | 5,7-Dimethoxy-6-methyl-2-phenyl-4H-chromen-4-one                  | 16.52    | C <sub>18</sub> H <sub>16</sub> O <sub>4</sub> | 296.10430 | 297.11157 |   |
| Structure                                                                           | Name                                                              | RT [min] | Formula                                        | Calc. MW  | m/z       | Mass List Matches                                                                     |
|  | 5,7-Dimethoxy-6-methyl-2-phenyl-2,3-dihydro-4H-chromen-4-one      | 16.36    | C <sub>18</sub> H <sub>18</sub> O <sub>4</sub> | 298.11995 | 299.12723 |  |
| Structure                                                                           | Name                                                              | RT [min] | Formula                                        | Calc. MW  | m/z       | Mass List Matches                                                                     |
|  | 5-Hydroxy-7-methoxy-6-methylflavon                                | 16.02    | C <sub>17</sub> H <sub>14</sub> O <sub>4</sub> | 250.06249 | 283.09598 |  |
| Structure                                                                           | Name                                                              | RT [min] | Formula                                        | Calc. MW  | m/z       | Mass List Matches                                                                     |
|  | 5,7-Methoxyflavanone                                              | 15.91    | C <sub>17</sub> H <sub>16</sub> O <sub>4</sub> | 284.10448 | 285.11176 |  |

| Structure                                                                           | Name                                                                                      | RT [min] | Formula                                        | Calc. MW  | m/z       | Mass List Matches                                                                     |
|-------------------------------------------------------------------------------------|-------------------------------------------------------------------------------------------|----------|------------------------------------------------|-----------|-----------|---------------------------------------------------------------------------------------|
|    | 3-Hydroxy-5-methoxy-4,6,6-trimethyl-2-[(2E)-3-phenyl-2-propenoyl]-2,4-cyclohexadien-1-one | 15.52    | C <sub>19</sub> H <sub>20</sub> O <sub>4</sub> | 312.13566 | 313.14294 |    |
| Structure                                                                           | Name                                                                                      | RT [min] | Formula                                        | Calc. MW  | m/z       | Mass List Matches                                                                     |
|    | Tectochrysin                                                                              | 15.22    | C <sub>16</sub> H <sub>12</sub> O <sub>4</sub> | 236.04698 | 269.08047 |    |
| Structure                                                                           | Name                                                                                      | RT [min] | Formula                                        | Calc. MW  | m/z       | Mass List Matches                                                                     |
|    | 5-Hydroxy-7-methoxy-6,8-dimethylflavanone                                                 | 15.00    | C <sub>18</sub> H <sub>18</sub> O <sub>4</sub> | 298.11987 | 299.12717 |    |
| Structure                                                                           | Name                                                                                      | RT [min] | Formula                                        | Calc. MW  | m/z       | Mass List Matches                                                                     |
|    | 5,7-Methoxyflavanone                                                                      | 14.84    | C <sub>17</sub> H <sub>16</sub> O <sub>4</sub> | 284.10442 | 285.11169 |    |
| Structure                                                                           | Name                                                                                      | RT [min] | Formula                                        | Calc. MW  | m/z       | Mass List Matches                                                                     |
|  | 5,7-Dimethoxy-6-methyl-2-phenyl-4H-chromen-4-one                                          | 14.59    | C <sub>18</sub> H <sub>16</sub> O <sub>4</sub> | 296.10427 | 297.11157 |  |
| Structure                                                                           | Name                                                                                      | RT [min] | Formula                                        | Calc. MW  | m/z       | Mass List Matches                                                                     |
|  | 5-Hydroxy-7-methoxy-6,8-dimethylflavanone                                                 | 14.52    | C <sub>18</sub> H <sub>18</sub> O <sub>4</sub> | 298.11988 | 299.12717 |  |
| Structure                                                                           | Name                                                                                      | RT [min] | Formula                                        | Calc. MW  | m/z       | Mass List Matches                                                                     |
|  | 5,7-Dimethoxy-6-methyl-2-phenyl-4H-chromen-4-one                                          | 14.29    | C <sub>18</sub> H <sub>16</sub> O <sub>4</sub> | 296.10430 | 297.11160 |  |
| Structure                                                                           | Name                                                                                      | RT [min] | Formula                                        | Calc. MW  | m/z       | Mass List Matches                                                                     |
|  | 5,7-Dihydroxy-6-methyl-2-phenyl-4H-chromen-4-one                                          | 14.10    | C <sub>16</sub> H <sub>12</sub> O <sub>4</sub> | 268.07308 | 269.08035 |  |

| Structure                                                                          | Name                                                            | RT [min] | Formula                                             | Calc. MW  | m/z       | Mass List Matches                                                                   |
|------------------------------------------------------------------------------------|-----------------------------------------------------------------|----------|-----------------------------------------------------|-----------|-----------|-------------------------------------------------------------------------------------|
| 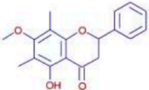  | 5-Hydroxy-7-methoxy-6,8-dimethylflavanone                       | 13.89    | C <sub>18</sub> H <sub>18</sub> O <sub>4</sub>      | 298.11999 | 299.12729 |  |
| Structure                                                                          | Name                                                            | RT [min] | Formula                                             | Calc. MW  | m/z       | Mass List Matches                                                                   |
|   | Demethoxymatteucanol                                            | 13.75    | C <sub>17</sub> H <sub>16</sub> O <sub>4</sub>      | 284.10434 | 285.11160 |  |
| Structure                                                                          | Name                                                            | RT [min] | Formula                                             | Calc. MW  | m/z       | Mass List Matches                                                                   |
|   | 5-Hydroxy-7-methoxy-6-methylflavon                              | 13.44    | C <sub>17</sub> H <sub>14</sub> O <sub>4</sub>      | 282.08872 | 283.09601 |  |
| Structure                                                                          | Name                                                            | RT [min] | Formula                                             | Calc. MW  | m/z       | Mass List Matches                                                                   |
|   | 1-(2-Hydroxy-4,6-dimethoxy-3-methylphenyl)-3-phenyl-1-propanone | 15.35    | C <sub>18</sub> H <sub>20</sub> O <sub>4</sub>      | 150.06780 | 301.14288 |  |
| Structure                                                                          | Name                                                            | RT [min] | Formula                                             | Calc. MW  | m/z       | Mass List Matches                                                                   |
|  | Paclobutrazol                                                   | 13.69    | C <sub>15</sub> H <sub>20</sub> Cl N <sub>3</sub> O | 293.12889 | 294.13617 |  |
